# Supplementary material for: Pluvial and compound flooding in a coupled coastal system modeling framework: New York City during post-tropical cyclone Ida (2021)
Source: Copernicus journal article supplement (doi:10.5194/egusphere-2024-2058), 2024-08-13
Supplement: Supplementary file [file egusphere-2024-2058-AC1-supplement.pdf]

The authors thank the reviewers for a very detailed reading of the paper and substantive comments that have clearly improved the research and its presentation. Below are the original comments in blue color and italics and our responses below them.

### **# Anonymous Referee #1**

**Received: 30 Aug 2024**

#### **Summary**

*The manuscript describes improvements made to an existing hydrodynamic model, COAWST, that will now include a uniform drainage rate as a volumetric source to represent the urban drainage system and infiltration. The improved model was tested over the Jamaica Bay watershed (NYC) during Hurricane Ida's impacts. Results are compared with limited high-water marks, and a sensitivity analysis was performed to see the system performance under the variation of the storm impacts.*

#### **General Comments**

*The research work proposed by the authors is interesting and might be suitable for the selected journal. However, the manuscript needs substantial changes to reach the expected standards in top-tier journals like this one. Thus, if my comments are addressed, maybe the manuscript will be more suitable for publication.*

- 1. First, there seems to be a misunderstanding of the terminology and hydrologic concepts throughout the manuscript. For example, the title states pluvial and compound flooding, but compound flooding may already include pluvial drivers. I suggest the authors follow a nomenclature of pluvial, fluvial, and coastal flood drivers and specify in their scope that they will be considering only the pluvial-coastal interaction. Thus, they can reference this as a compound flood. See line 65 for another example of a pluvial compound. Please revise all the terms used in the paper.*

The reviewer is correct in that Ida was not both a “compound” flood and a “pluvial” flood at one time. We agree that one storm cannot be both and that compound flooding can include the pluvial driver. Ida caused pluvial flooding, but we also simulate a counterfactual compound (coastal and pluvial) flooding. We have edited the title to make clear that the compound flood was hypothetical (“potential compound flooding”).

- 2. Second, the manuscript format is not suitable. For example, when researchers introduce a new model or modification, they should add a limitation section before the results, so the reader is aware of this upfront. However, despite the study's many limitations, the authors only summarize in the last paragraph of the discussion. I think the authors have more than enough to have a robust limitation section.*

Section ‘2.7. limitations’ is added as reviewers suggested.

- 3. Also, the introduction lacks a clear research gap/motivation for the work. So far, I can interpret from the introduction the importance of flood modeling but not what others have done regarding pluvial-coastal flood modeling in urban settings and the rationale for making these improvements to the COASWT model. Thus, I urge the authors to give some context to the previous works in this field, present the knowledge gap, and discuss their research questions that will bridge this gap.*

Change made. We revised the Introduction, specifically the section related to the research gap and research questions so that it shows more clearly the gap and research questions in this study.

- 4. Also, Lines 82-88 disrupt the story-telling flow that all peer-reviewed journals should have, especially in the introduction. Thus, please rephrase.*

Change made. We have revised the section to keep the story telling flow.

5. *Furthermore, the description and figures of Ida's event should be moved to section 2.1. In the results section, the authors repeat too much or/and give too many details when describing the results.*  
Changed made. All the description related to Ida moved to Section 2.1. (see specific comments #8)
6. *Lastly, my biggest concern with the manuscript is the substantial simplification of the hydrologic process the authors did for the model improvement. I can support a simple approach, but the authors need to then justify their selection. Furthermore, the authors have many vague statements in the discussion and conclusion section that are not properly supported by the results and/or the model simplification. For example, I would not suggest stakeholders and decision-makers use the results of this model to provide flood- resilience measures to avoid Ida's flood impact since the authors simplified the storm drainage system and infiltration as a uniform drainage rate over the entire basin on the model. Also, their rainfall addition is not included in the governing equations as a source code and only as a volumetric addition, which can produce different hydrodynamic behaviors expressed by previous studies. At a bare minimum, the authors should compare their approach with other rain-on-grid models. I think the authors need to defend and justify their selected approach with more detail.*

We acknowledge the reviewer's concern about the simplification of the hydrologic process in our model, particularly the use of a uniform drainage rate across the basin. As noted in our original manuscript, this modeling approach was chosen because of the difficulty of obtaining detailed and reliable stormwater infrastructure data. In the case of New York City, these data are not public due to security concerns and would need to be obtained from multiple government entities (e.g. New York City and the Port Authority of NY/NJ). However, our experience with the model calibration for two different rainfall events has shown that under intense rainfall conditions, where the stormwater system is overwhelmed, the modeling can nevertheless have acceptable accuracy. This is evident from the high-water mark (HWM) observations (now at 18 locations), which agree well with our model outputs. We have added details of this more detailed calibration to the revised manuscript and supplementary material for further clarity.

Furthermore, while the current simulation of Ida uses a uniform drainage rate, the model itself is fully capable of incorporating spatially variable drainage rates. In the original manuscript this was discussed in the "Future Improvements" section of the discussion, where we outlined plans to update the model once more detailed stormwater system data becomes available. Therefore, while this simplification was a limitation for this simulation of Ida, it is not an inherent limitation of the modeling approach itself.

Regarding stakeholder use of the model, we would like to emphasize that the current model has already resulted in data utilized by NYC Emergency Management for understanding Ida and the 2023 event described in the Supplementary Material. They find it useful for estimating where flooding occurred and where there may be vulnerability to flooding, as they have no other source of Ida flood map data. Our collaboration has resulted in the publication of a Version 1 flood map for Hurricane Ida (Kasaei et al., 2024). This provides evidence that the model, even with its current limitations, is of value to stakeholders. We have also addressed and clarified this point in the text (please see Comment #48 for further details). In this case, the managers understand the simplifications of the modeling approach and are not making detailed infrastructure decisions based on the results.

Concerning the rain addition, you are correct that the original manuscript wasn't clear about how the volumetric addition of water was incorporated into the model. We have clarified the text to say that the rainfall is incorporated into the governing equations of the model. We have provided additional details on this in response to Comment #10 to clarify how rainfall is handled within the model.

Lastly, we have revised several statements in the discussion and conclusion sections (see Comments #47, 48, and 52) to eliminate any vague language and ensure that our findings and interpretations are directly supported by the results.

We hope these clarifications address your concerns.

### Specific Comments

1. *L12: replace all with most, remove highly, and replace vulnerable with prone.*  
Change made.
2. *L19: RMS is not defined before using its acronym.*  
Change made to read ‘Root Mean Square Error (RMSE)’.
3. *L32: remove “and motivation” from the section header.*  
Change made.
4. *L49-51: the statement needs support from a reference.*  
Change made. Reference added at the end of the sentence. ‘(Wahl et al., 2015)’
5. *L61: how about also the overestimation? Studies have shown that not accounting for all the physical processes correctly can result in both under and overestimation.*  
Change made. We improved the paragraph context and wording.
6. *L71: ICPR model is now called StormWise, so please include this name for future reference of the readers.*  
Change made. ‘which is now called StormWise’ is added.
7. *L73-74: Is it crucial for compound flood simulations to have 3D hydrodynamics? The authors claim this as crucial and even one of their novelty, but they fail to provide evidence of such need in the field of the compound flood. Please justify why this is needed with cited literature.*  
Change made.  
“COAWST also incorporates three-dimensional hydrodynamics which is important for accurately predicting baroclinic and stratification effects on storm tides in coastal and estuarine areas (Orton et al., 2012; Ye et al., 2020).”
8. *Figure 1: The watershed is barely noticed on panel A, so increase the line width. The authors can use the USGS HUC watershed shapefiles for this. Also, I am almost certain that the authors do not have copyright permission to include a figure from Wikipedia as the one in panel b, so please make your own figure. When you make your own figure, please describe what the color points mean. Lastly, this figure should be moved to Section 2.1.*  
Change made. Watershed added, and storm track plotted manually, and the figure moved to section 2.1.
9. *Section 2.1: the authors should include a brief summary of other storms that affected the watershed and its response to the system, such as Hurricane Sandy.*  
Change made. This part added at the end: “... the prior major disaster in the region of Hurricane Sandy (2012) was predominantly a coastal flooding event that severely impacted neighborhoods surrounding Jamaica Bay and spurred major efforts focused on strengthening coastal defenses (USACE, 2022).”

10. L126-128: *does this mean that the rainfall component is not directly integrated into the governing equation as a source term? Please explain better and justify your approach. Several authors have included rainfall on coastal models by modifying their governing equations, like Dresback et al. (2022) and Santiago-Collazo et al. (2024).*

Thank you for your comment. We would like to clarify that rainfall is directly integrated into the governing equations in our COAWST-ROMS model. Specifically, we modified the vertical momentum equation to include the vertical displacement of the water level due to the volume of rain, affecting the free surface and water column dynamics. Additionally, the continuity equation was adjusted to account for the rainfall's volumetric contribution, ensuring proper mass balance in the system. This approach aligns with studies like Dresback et al. (2022) and Santiago-Collazo et al. (2024), where rainfall is incorporated by modifying the governing equations. By integrating rain into both momentum and mass balance, our model comprehensively captures its effects on coastal dynamics.

So, we added this clarification to the text: “Rainfall is directly integrated into the governing equations in the model. The vertical momentum equation is modified to include the vertical displacement of the water level due to the volume of rain, affecting the free surface and water column dynamics.

Additionally, the continuity equation includes a source term to account for the rainfall's volumetric contribution. This approach aligns with other studies (Dresback et al., 2023; Santiago-Collazo et al., 2024), where rainfall is incorporated by modifying the governing equations.”

11. L129-132: *the authors should comment more about the limitations their selected approach for drainage rate affects accuracy and real-life scenarios. For example, the spatial variation of the stormwater infrastructure, the temporal-varying drainage rate of the system during the event, and the backwater flow preventer structures placed typically in the sewer outlets, to mention just a few.*  
Change made. This part added to section ‘2.7. Limitations’.

12. L132-133: *I disagree with the author's statement that the model does not need to route the remaining runoff toward the ocean for their study. However, they claim the importance of their model for compound flood assessment, but the first point where you exhibit compound flood in coastal urban cities is the drainage outfall and how it propagates inland through the system. Obviously, the authors' proposed model is far from capturing this, but they still claim this (L363-364). I will be careful with their statements, especially if they cannot properly back up their statement with results.*

The reviewer is correct that the model will not capture processes involving actual routing of the flood waters through the stormwater system. We note the paper already included a caveat that ... [model simplifications such as spatially uniform drain rates could be modified in future work to capture a more complex and thorough evaluation of urban flooding (line 431-432 of the original manuscript)].

The statement on line 363-364 was “These findings underscore the model’s utility in representing compound flooding events, such as for hurricanes that bring both extreme rainfall and storm surge.” As demonstrated by the observations and our modeling of Ida, the stormwater system did not function properly during this extreme event. Whether or not the stormwater pipes and blockages of outfalls due to high sea levels are represented in the model is of only secondary importance in such flood events.

As a result, we do feel that the model is useful for studying compound extreme events and we have kept that text.

Appreciating the reviewer’s point, we have added a limitations section, and it includes the suggestion for future work could include full coupling with a hydraulic stormwater system model.

13. L150: *the authors should give more details about the hot start simulation they performed to initialize the model.*

Change made. More details were added:

“The Ida simulation commences from a state of rest and temperature and salinity are initialized as spatially constant values, although the full 3-D salt and temperature fields could be utilized to capture baroclinicity and stratification effects on storm tides. The open boundaries of the nested model are set using Chapman conditions for the free surface, Flather conditions for 2D momentum, and radiation conditions for 3D momentum, and the gradient condition is applied for salinity and temperature, effectively holding them constant within the domain (Marchesiello et al., 2001). Since the spin up is only for velocity and water level, it only requires hours to stabilize.”

The information on the initialization of the parent model was available on lines 159-160 of the original manuscript.

14. L156-157: *the authors should locate these gauges on a Figure. The reader should not wait until the results to find the gauge. The same occurs with other gauges mentioned in the methods section.*

Change made. A figure showing the location of the Kings Point, Bergen Basin, and Sandy Hook gauges added. (Figure 2c)

15. L158: *if you are using coastal gauge water levels to represent storm surge conditions, then you are not modeling storm surge directly on your model with a wind and barometric field pressure. This isn't very clear to me and will not be clear to the reader. Please rephrase. Also, if the answer to my question is true, the authors are not modeling storm surge directly; rather, they are just propagating a coastal flood inland. This will need clarification throughout the entire manuscript to change what you call “simulating storm surge” to “simulating coastal flood.” The reader will expect that if you are simulating storm surge, then you are applying wind stress to the ocean domain in your model and not just a water level at the boundary condition.*

We do use the spatially varying wind stress and barometric pressure in both model domains as atmospheric forcing (as stated in lines 158 and 176 of the original version of the manuscript).

We understand the reviewer’s concern of miscommunication, so we added additional explanation about how we impose storm surge in the model: “Additionally, subtidal water levels calculated from observations at the NOAA tide gauges at Sandy Hook (NJ; NOAA station 8531680) and Kings Point (NY; NOAA station 8516945) were added to the model boundaries in New York Bight and western Long Island Sound, respectively. In addition, we simulate the influences of local wind stress and barometric pressure changes on the regional storm. This combination of boundary conditions and in-domain forcing allows for a more accurate representation of both local and regional storm surge effects.”

16. L155-160: *Authors should add a figure of the model domain with a clear description of the model boundary conditions. This will add the explanation in this paragraph.*

Change made. A figure of the parent model with a rectangle pointing to the location of the nested model added to figure2, also an explanation of the model boundary condition added to the section: “The open boundaries of the nested model are set using Chapman conditions for the free surface, Flather conditions for 2D momentum, and radiation conditions for 3D momentum, and the gradient condition is applied for salinity and temperature, effectively holding them constant within the domain.”

17. *Figures 2-3: combine them into a single figure with two subpanels. There are many similar instances of this, such as Figures 4-5. Please try to achieve this since the fewer figures, the better for the reader.*  
Change made. Figures merged.

18. *L170-174: would this mean that you only simulated pluvial flooding and not compound flooding since your coastal flood was minor during this event? If true, the authors should be more clear on their terminology and manuscript language. The reader will expect a “good amount” of both flood drivers to call the event a compound flood. Please be more clear with this earlier in the manuscript. I want to say that the authors should have selected a different event, such as Hurricane Sandy since Ida did not bring significant coastal floods. Furthermore, the justification of selecting Ida as the event due to data for calibration is not supported since you cannot accurately calibrate a whole watershed with only a handful of high-water marks, especially if they are in places where water does not accumulate greatly. The reader will question why you did not model Sandy, so please include a justification for this and why Ida was best. If your purpose was to simulate extreme rainfall, Ida is fine, but if you wanted to simulate a compound flood event, then Ida was not ideal.*

We have clarified our study’s focus and terminology more explicitly, making edits to the beginning of the final paragraph of the introduction, stating:

This study improves COAWST to enable pluvial and compound (pluvial-coastal) flood simulations. We simulate Ida’s flooding in the Jamaica Bay watershed of New York City in 2021, including exploring different counterfactual scenarios of a shifted storm track causing more intense rainfall and a shifted storm timing causing the rain to peak at high tide to cause compound flooding.

While Ida primarily caused pluvial flooding, we included these tests to demonstrate COAWST’s ability to simulate compound flooding under hypothetical scenarios of temporal shifts. This capability is a valuable outcome of our study, and we have already stated in the original manuscript that Ida was primarily a pluvial event (line 16), and exploring the potential compound (lines 21, 75).

However, we understand the reviewer’s concern, and we have now added further clarification in the abstract (and title) to avoid any potential misunderstanding: "Sensitivity analyses are used to study the broader risk from events like Ida (pluvial) and potential compound (pluvial-coastal) flooding."

Regarding the selection of Ida over Hurricane Sandy, the latter was also not a compound flood event, as less than one inch of rainfall occurred, and it was not raining around the time of peak storm surge. Instead, we have chosen Ida as the primary focus because our goal was to develop the capability and simulate the impact of extreme rainfall. While Ida did not result in significant coastal flooding, the event provided valuable data for calibrating the model’s rain and drainage capabilities, which was essential for our research objectives. We added another less intense rainfall event (Sep 29, 2023, with more observed flood values as HWMs) that we simulated and used for validation, described in the supplementary material.

We hope these revisions address the reviewer’s concerns and make the study’s objectives and methods more transparent.

19. *L173: quantify the adjective “far below”. Similarly, the authors have many vague adjectives that need quantification, such as “significant,” “accurate,” and “good.” What for the authors is far below could be different to me.*

Change made. The street level of 3.17 m NAVD88 at the location of Bergen Basin gauge added to the sentence.

20. *L180-186: I consider this too much detail about the radar rainfall source. The authors should use only one sentence and cite a reference unless they extensively use rainfall for their model, which is not the case, I believe.*

Change made. We summarized the section by stating only the justification of using MRMS QPE product:

“The MRMS QPE data provide 1.11 km spatial and 1-hour temporal resolution, combining radar, satellite, and rain gauge observations with bias correction to offer more accurate precipitation estimates than radar-only products (Zhang et al., 2016).”

21. *L189: how does this 70 mm/hour of rainfall compare with other events at the basin? For example, the authors could compare this with return period values from the NOAA Atlas 14.*

Change made. 70 mm/hour rain intensity or 2.76 inch/hour corresponds to a rain event with 50-year return period based on NOAA Atlas 14 at ‘NEW YORK JFK INTL’ station. The explanation added to the section is:

“The maximum hourly rainfall intensity was 70 mm/hour during Ida, which is a 50-year return period rain event (2.76 inch/hour) based on NOAA Precipitation Frequency Data Server (station ID: 30-5803) (National Weather Service).”

22. *L192-193: remove this sentence.*

Thank you for your feedback. We have removed the sentence from the main text as requested. To satisfy the journal's policy on proper attribution of data sources, we have retained the information in the figure captions stating that “base maps are from MATLAB, hosted by Esri®”. This ensures that the source of the basemaps is clearly acknowledged in the relevant figures.

23. *Figures 4-5: include the basin boundary on the map so we can assess visually the amount of rainfall that falls inside.*

Change made. The watershed boundary added to the figure.

24. *Figure 6: Why show six days of rain if everything happens on a single day? I consider even the graph unnecessary since it gives the impression that the authors are simulating uniform rainfall using the values on this graph.*

Thank you for your feedback. The five-day range is included to show the concentrated nature of the rainfall event and to avoid any implication of continuous or uniform rainfall across the period. We added this to clarify this point in the text to avoid any potential confusion:

“Figure 4 shows the time series of rainfall to highlight the sharp peak of rainfall during the 5-day simulation and the absence of significant rainfall before and after.”

Indeed, we already stated about the using the spatially and temporally varied rain in line 127 of the original manuscript (“The rain rate is included as an additional spatially and temporally varying meteorological forcing variable”) to avoid any confusion.

25. *L212: what do the selected values of drain rate physically mean for the system? Do they have any physical justification for being selected, or are they just random values that work?*

The drainage rates represent the infiltration and stormwater system in the model. Candidate values ranged all the way up to 44 mm/hour, the storm water system capacity stated by NYC. Here in the manuscript, we present some values that lead to the best results to match the observed data. We added more clarification in the methods about the process. Also, the discussion on section 4 paragraph five is about the reasons why the system may not work at its design criterion.

26. *L221: all of the urban areas the same? The authors are using a typical value of CN*

*for their whole area. However, areas do change, and the soil type and antecedent conditions also play a role in the curve number value selected. The authors should talk more about this since it is crucial for their results, and not just say everyone uses 90 and that it. I strongly recommend the authors compute their own weighted average CN for their watershed using all the parameters needed since that would be more defensible than the current approach. In my opinion, the authors have been too simple on the hydrologic side of the study, which is crucial for any compound flood simulation.*

We appreciate the reviewer's feedback and have updated this calculation. Instead of applying a uniform CN value of 90, we recalculated a weighted average CN of 93.95. This was determined by using CCAP land cover data, which was already provided in our paper, and soil classification data from the USDA-NRCS Web Soil Survey and the Jamaica Bay Coastal Zone Soil Survey. The soils in the area primarily fall under Hydrologic Soil Group C, reflecting moderate infiltration rates. This updated CN calculation provides a more accurate estimate of the region's runoff potential during Hurricane Ida. We added these data to the manuscript:

“To reflect the spatial variability in urban and non-urban areas, a weighted CN of 93.95 is derived based on the land cover categories (C-CAP data, Figure 2d) and soil data from USDA-NRCS Web Soil Survey (U.S. Department of Agriculture; Cronshey, 1986).”

27. *L222: Can the authors confirm the rainfall amount in 3-hr, using rain gauges within the basin instead of only depending on the radar data, which will not always be 100% accurate? For example, authors could use the CoCoRHAS network.*

Thank you for your suggestion regarding the use of rain gauges. We compared data from the Howard Beach station (40.66, -73.84) which is in our domain from CoCoRaHS network on 02 Sep 2021, which recorded 126 mm (4.96 inches) of rainfall (7 am), to MRMS data, which reported 102 mm (4 inches) at the same location same day. This demonstrates the reasonable accuracy of MRMS data. It should be noted that the 74 mm (2.93 inches) used in CN calculation is the average rainfall depth per cell across the domain, essential for runoff estimation. Figure 3.b shows spatial variability of the rainfall, with the western domain receiving more rain, explaining why the average is lower than the observed rain at Howard Beach.

We also added this in the text to avoid any misunderstanding:

“We consider the rainfall associated with Ida as a concentrated 3-hour period of precipitation (as vast majority of the rain is over three hours according to MRMS), starting at 02 Sep 2021, 00:30 UTC. A comparison of the gauge data from the CoCoRaHS at Howard Beach station (126 mm) with MRMS data at the same location (102 mm) confirms the reasonable accuracy of MRMS. During this period the rainfall generates an average of 74 mm (2.9 inches) total accumulation across the domain.”

28. *L225-226: this is another big limitation that is not addressed in the manuscript. There are many models out there that use the spatially varying rainfall to generate spatially varying runoff instead of just a single runoff volume for the entire basin. For example, how would the results change if the authors used the average rainfall over that basin instead of the maximum value? Those are key questions that need to be answered within the sensitivity analysis to justify the approach.*

Thank you for your comment. We would like to clarify that the presented runoff calculation using the average rainfall depth across the domain is represented only to compare the model's uniform drain rate (which was calibrated based on the best fit with observed HWMs) with an estimate of potential runoff generated by the storm, as mentioned in line 214 of the original manuscript. It is true that the CN approach is simplistic, but it is only used to provide a simple comparison to the drainage rates. We disagree that this is a limitation in the manuscript, as the manuscript provides much more complex modeling than the CN computation.



29. L226-227: *While I agree with the authors' statement, it is not appropriate for their study due to the gross simplification of uniform rainfall and drainage rate. Designing stormwater infrastructure requires more than this since as you keep going downstream towards the outlet, your main sewer line will start receiving more runoff than upstream or other collecting pipes with a smaller catchment area.*

As noted above (#28), the presentation of the CN is presented just for context and comparing our calibrated drainage rate.

This paper is not giving any suggestions on the stormwater system, we are here only providing a flood map and exploring some possible sensitivity scenarios.

As noted in the original manuscript (Figures 4 and 5), our modeling applies spatially varied rainfall.

30. L234: *if you only shifted the rainfall field, means that you did not shift the wind field. Thus, you compound simulation is not well represented. Furthermore, this statement confirms for me that you did not simulate storm surge over the domain as my previous comment suggests.*

We are shifting rainfall field and wind field when investigating the spatial shift tests. We added “rain fall and wind field” to be more clear about this.

31. L238-240: *this information should be in section 2.1. Also, why not use the return period values at NYC and use the Northeastern states? A local comparison could benefit since a 10-yr return period is not extreme.*

Change made. Looking at the local station also shows the same 3-hour rain with a 10-year return period (71 mm), and if we look at the maximum intensity (70 mm/hour) which already is stated in section 2.3, this corresponds to a one-hour rain with 50-year return period.

We added (section 2.1):

“Ida’s rain averaged across the Jamaica Bay watershed was 71 mm (2.8 inches) over 3 hours, which corresponds to a 10-year return period (between 5 and 25 years) based on NOAA Precipitation Frequency Data Server (Station ID 30-5803). However, the maximum intensity (Figure 3) reached to 70 mm/hour, or a one-hour rain event with a 50-year return period (2.76 inch/hour) based on the same NOAA data (National Weather Service).”

32. *Figure 7: combine with Figures 4-5.*

Change made. Figure combined to Fig. 3c.

33. L257: *why not synchronize the peak storm surge with the high tides also? You already had low storm tide conditions. The suggestion made by the authors would not affect your compound flood since the storm tide conditions were already low. This can be shown in the results. If the author manipulates the water level boundary conditions to coincide the peak storm surge with high tide, then they could have a more significant compound flood in the model than what they have now.*

Thank you for your suggestion. We altered the simulations and now we synchronize the peak storm surge with the high tide when investigating the temporal shift cases. As you can see in the figure below, the synchronization of the storm surge with high tide, result in 0.3 meters higher water elevation at Bergen basin gauge.

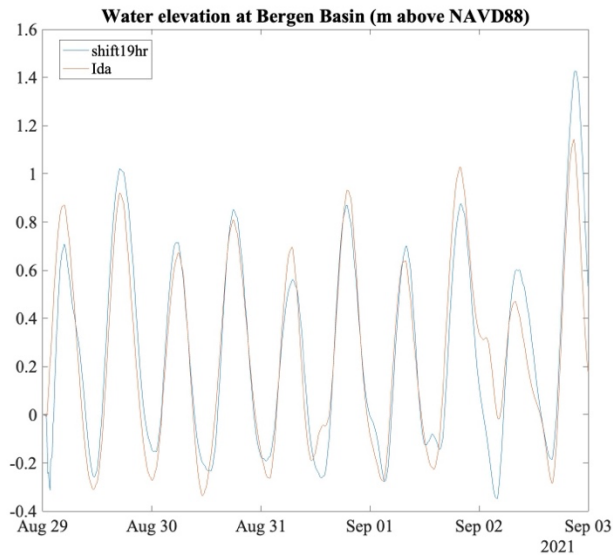

However, we should mention that now with more HWMs and the additional rain event (29 September 2023), the calibrated drainage rate for the model equals to 13 mm/hour, so this addition in the drainage rate counter acts the higher water elevation. That explains why, despite the evidence of compound flood, its impact is not too severe.

34. L268: are you referring to the “no infiltration” to the “drainage rate” component of the research? The authors never computed infiltration in the method section. I know that, in theory, it is the same sink term, but this could confuse the readers, so be consistent with your terminology.  
Change made. Used “drainage rate” instead.

35. L269: it is technically impossible to see the flood depths to vary spatially since you apply uniform rainfall, drainage rate, and runoff. What you see is a deeper flow in low-lying areas since it tends to accumulate, but a varying rainfall, drainage rate, and runoff (which is more realistic) will show varying floods.

Thank you for your insightful comment. We would like to clarify that our model does indeed incorporate spatial and temporal variability in rainfall (Line 127 of the original manuscript) and as a result, runoff. In the base model used to simulate Ida's flood impact on Jamaica Bay, rainfall is not applied uniformly. Instead, we account for temporal and spatial variation in rainfall distribution. This variability, along with the interaction between rainfall and topography, results in the spatially varying flood depths observed in the model output. We have updated the text in the manuscript to clarify this point.

36. L270: what do the authors mean by Dcrit?

For wetting and drying, the minimum depth to allow flow out of the cells, is named Dcrit. This explanation is stated in Line 151 of the original manuscript.

37. L271: why do the authors label the high-water marks as empirical? Are they were not field surveyed? Explain more.

Change made. They are indeed surveyed high-water marks; in the text we used “surveyed” instead to make this clear.

38. L273-275: remove the sentence since this is obvious when comparing data to high- water marks.

Change made. Sentence removed as reviewer's suggestion.

39. L275: *the location of the high-water marks with respect to the deeper flood locations is another limitation of the study that the authors should highlight in the corresponding section.*

The limitation regarding the location of the high-water marks (HWMs) with respect to the areas of maximum inundation is acknowledged in the study. It is important to note that the HWMs used in this analysis represent all the available data. While these HWMs may not perfectly correspond to the locations of maximum modelled inundation, they still provide valuable information for validating the model, albeit with this noted limitation. To address this limitation, further investigation of another rain event (September 29th, 2023) has been added to the calibration and more information about the event itself is presented in the supplementary material. This way by adding another storm and more HWMs, in different areas of the watershed, we compensate for the data limitation and strengthen the overall validation process. We also updated the calibration section, using the HWMs from both events, in the main manuscript.

40. L286: *I would not call what the authors did a hydrologic model.*

“hydrological” removed based on reviewer’s suggestion.

41. L287: *Why did the authors select these drain rates? Justify and put into context what these values might represent. For example, an X-in pipe is flowing full. That would make it easier to relate to the real world.*

The selected drain rates of 6 mm/hour (0.25 inch/hour), 13 mm/hour (0.5 inch/hour), and 19 mm/hour (0.75 inch/hour) were chosen based on physical reasoning and calibration against observed data.

We agree that adding context would be of value in the paper, so added the line to Section 2.4:

“Potential drain rate values extend up to 44 mm/hour, which corresponds to the design capacity of the stormwater system (Nyc-Mocej, 2023).” The 13 mm/hour rate, which provided the best fit to high-water marks from both the main event and a less intense event (details in supplementary material), reflects a reasonable drainage rate for the model based on the best fit with observed HWMs.

42. L296: *the authors mention here that the Cn calculations were used using hourly rainfall, but in the respective section, they said they use the maximum value of rainfall over the basin within a 3-hour time window. Therefore, these arguments confuse the reader. Please decide what hourly runoff or a single value you used.*

Change made to add clarity: “According to the CN calculations in Section 2.4, Hurricane Ida is estimated to generate an average of 58 mm of runoff over a 3-hour period, which corresponds to a runoff rate of approximately 19 mm/hour (or 0.75 inch/hour). This establishes the necessary rate at which stormwater must be managed to ensure proper drainage.”

43. L305: *what do the authors mean by “non-zero depth HWMs”?*

This refer to the HWMs that are not zero-depth in the model output (in the plots) but remain unchanged with drainage rate variation. We changed the sentence to be more clear: “The HWMs (in Figure 7 plots) that remain unchanged with increasing drainage rates are elevated, steeply sloping locations where water rapidly flows and does not accumulate.”

44. L314-317: *can you reference someone else who has followed a similar flood classification? Also, why is important to classify them as this? Also, I would expect the authors to change the color scale on the results to use this classification rather than the numeric values. If not, then what is the purpose of the classification in the first place?*

Thank you for your insightful feedback on the flood depth classification and its relevance to our study. The purpose of the simplified classification is to describe impacts, much like National Weather Service metrics of flooding, minor-moderate-major.

While the classification system used in the paper (shallow: 0–0.3 m, deep: 0.3–0.9 m, and extreme: > 0.9 m) is not an official standard, it is grounded in practical observations of flood impacts. This kind of classification simplifies communication, helping readers quickly understand the varying levels of risk associated with different flood depths.

Regarding your comment about using the classification in the color scale of the results, we chose to present the data in its continuous form in the figure. This allows us to convey the detailed variation in flood depths rather than reducing it to broad categories. While the classification is useful for summarizing and communicating results in the discussion, the figure serves a different purpose figure has the different purpose to convey the data in more detail.

*45. Figure 11: why not include the histogram insert in Figure 9? Also, the authors should combine this figure with Figure 9.*

Thank you for your suggestion. Histograms are presented only for the calibrated model (simulation with a 0.5-inch/hour drainage rate) and are shown for both the flood depth map (as seen in Fig. 11 of the original manuscript) and the speed map. Figure 9 (in the absence of drainage rate) in the original manuscript shows the HWM locations and helps readers visually compare the effect of drainage rate on the spatial variation of flood depth. Given this purpose, we believe it is useful to retain this figure separately rather than combining it with other figures.

*46. L361: it is not clear what is the second scenario within the context of the sentence.*

Thank you for your feedback. Temporal shift scenarios are explained in detail in section 2.5 of the original manuscript (line 259). To add clarity, we have added a reference to section 2.5 in this line to clarify what the second scenario refers to.

*47. L363-364: the authors do not have the necessary results to support this claim. For example, if the authors have run three different flooding scenarios (rainfall only, storm tide only, and compound flood), then they could comment on how important are each of those flood drivers in their modeling approach and in the compound flood assessment.*

Thank you for your comment. Our statement does not intend to imply that we performed a detailed compound flood assessment or quantified each individual flood driver. Instead, we simply stated, "These findings underscore the model's utility in representing compound flooding events," which refers to the counterfactual scenario we presented. We believe this scenario provides valuable insights for both readers and emergency managers. For further details on the model's utility, please see #48 below.

*48. L376-377: I disagree with the authors. While simple models could be useful, the authors fail to show this on the manuscript. Thus, it results does not support the claim.*

We have strengthened the support for this claim by publishing Version 1 of the flood map for Ida, in collaboration with NYC Emergency Management (NYCEM) (Kasaei et al., 2024). They found the map useful for understanding the flooded areas and for internal purposes.

*49. L381: the authors use the concepts of vulnerability and risk throughout the entire manuscript. However, they really only focus on the hazard component. To talk about risk the authors need to talk about the socio-demographics and the community's exposure. I will move away from these concepts since it is not the main focus of the study and replace it with the term hazard.*

Thank you for your insightful comment. As our study focuses primarily on the spatial analysis of flooding hazards in the Jamaica Bay watershed and does not include a detailed exploration of socio-demographic factors or community exposure, we will adjust our language to reflect this.

50. *L388: can this only be because tides? Authors should show results with and without rain and tides to see how each driver interacts, and they could make a similar statement.*

The reviewer caught an error in the text, and we have revised it to focus on the coastal driver influencing the extreme pluvial event, which is what the paper has quantified: “This indicates that compound flooding can cause greater danger in coastal flood zones during an extreme pluvial event.” We also note that we revised the temporal shift simulation to include storm surge, in addition to the high tide and rainfall. We also revised the figure, so that it shows both the flood depth difference map (left) and the grid cells with additional flood depth (more than 5 cm) around Hamilton Beach (right).

51. *L389: the authors talked about coastal flood zones but failed to define them. I will suggest citing Bilskie and Hagen (2018).*

Change made to improve the readability of the paragraph.

52. *L391-393: the authors do not support this statement with their current results.*

We agree that the manuscript doesn’t prove the model adequately captures compound flood processes because the model validation is only for a pluvial flood. Therefore, we have removed the word “processes” and left the remainder of the statement intact. “These results illustrate the capability of the COAWST to capture compound flood effects, and its utility for future modeling of a wider range of coastal-pluvial forcings to improve our understanding of coastal-urban flood hazard.”

53. *L396-398: There are already models that exist and are similar to the proposed approach but without the simplification taken here. For example, ICPR (known as StormWise) can include stormwater infrastructure, spatially varying rain, and runoff, and include coastal boundaries similar to the author’s approach.*

In response to the reviewer’s comment, we acknowledge that models like ICPR (StormWise) can handle stormwater infrastructure, spatially varying rainfall, and coastal boundaries. However, our approach differs by utilizing COAWST-ROMS, a fully 3D model, which we have improved to incorporate rainfall and drainage rates to represent stormwater systems. This 3D capability allows for more detailed simulation of vertical processes and interactions between stormwater and coastal dynamics, which ICPR, being a primarily 2D model, cannot capture. Our enhancements provide a more integrated framework for modeling complex coastal-stormwater interactions.

54. *L404 and 406: the word “run off” should be together like “runoff”.*

Change made.

55. *L423: the authors should not claim the sediment transport and erosion component of the model since it was not tested.*

Thank you for your valuable comment. We acknowledge that the sediment transport and erosion component of the model has not been directly tested in this study. We have revised the statement to clarify that this aspect is a potential application of the model rather than a feature that has been validated in this work. The updated text now reflects that our research primarily focuses on urban pluvial flood studies, and the influence of rain on estuary hydrodynamics: “Research made possible by this new model includes infrastructure adaptation planning for urban coastal pluvial flood studies, analyses of rain influence on estuary hydrodynamics, and has the potential for future studies on coupled pluvial-coastal flood-induced sediment transport and erosion.”

Dresback, K. M., Szpilka, C. M., Kolar, R. L., Moghimi, S., and Myers, E. P.: Development and validation of accumulation term (Distributed and/or Point Source) in a Finite Element Hydrodynamic model, *Journal of Marine Science and Engineering*, 11, 248, 2023.

Kasaei, S., Orton, P., Ralston, D., and Warner, J.: Post-tropical cyclone Ida (2021) flood map for New York City's Jamaica Bay watershed (1), Mendeley [dataset], 10.17632/hs2zt6ngwd.1, 2024.

Precipitation Frequency Data Server (PFDS): [https://hdsc.nws.noaa.gov/pfds/pfds\\_gis.html](https://hdsc.nws.noaa.gov/pfds/pfds_gis.html), last NYC-MOCEJ: New York City Stormwater Resiliency Plan, Report, 2023.

Santiago-Collazo, F. L., Bilskie, M. V., Bacopoulos, P., and Hagen, S. C.: Compound inundation modeling of a 1-D idealized coastal watershed using a reduced-physics approach, *Water Resources Research*, 60, e2023WR035718, 2024.

Zhang, J., Howard, K., Langston, C., Kaney, B., Qi, Y., Tang, L., Grams, H., Wang, Y., Cocks, S., and Martinaitis, S.: Multi-Radar Multi-Sensor (MRMS) quantitative precipitation estimation: Initial operating capabilities, *Bulletin of the American Meteorological Society*, 97, 621-638, 2016.
